# Supplementary material
Source: MDPI journal article supplement (https://www.mdpi.com/2072-4292/15/18/4487)
Supplement: s1 [file s1]

## **Supplementary material**

# Estimation of total phosphorus concentration in lakes in the Yangtze-Huaihe region based on Sentinel-3/OLCI images

Xiaoyang Wang <sup>1,2,3</sup>, Youyi Jiang <sup>1</sup>, Mingliang Jiang <sup>2</sup>, Zhigang Cao <sup>2</sup>, Xiao Li <sup>1</sup>,  
Ronghua Ma <sup>2,4,5</sup>, Ligang Xu <sup>2</sup> and Junfeng Xiong <sup>2,3,\*</sup>

<sup>1</sup> College of Geomatics, Xi'an University of Science and Technology, Xi'an 710054, China; xywang@stu.xust.edu.cn (X.W.)

<sup>2</sup> Key Laboratory of Watershed Geographic Sciences, Nanjing Institute of Geography and Limnology, Chinese Academy of Sciences, Nanjing 210008, China; jiangmingliang18@mails.ucas.ac.cn (M.J.); zgcao@niglas.ac.cn (Z.C.); rhma@niglas.ac.cn (R.M.); lgxu@niglas.ac.cn (L.X.)

<sup>3</sup> International Research Center of Big Data for Sustainable Development Goals, Beijing 100094, China

<sup>4</sup> University of Chinese Academy of Sciences, Nanjing 211135, China

<sup>5</sup> Jiangsu Collaborative Innovation Center of Regional Modern Agriculture and Environmental Protection, Huaiyin Normal University, Huaian 223001, China

\* Correspondence: jfxiong@niglas.ac.cn

Table S1. Lakes larger than 20 km<sup>2</sup> in the Yangtze-Huaihe region.

| Lake      | Area(km <sup>2</sup> ) | Lake     | Area(km <sup>2</sup> ) | Lake      | Area(km <sup>2</sup> ) |
|-----------|------------------------|----------|------------------------|-----------|------------------------|
| Baidang   | 38.68                  | Gehu     | 139.03                 | Qili      | 68.48                  |
| Baima     | 124.71                 | Gucheng  | 31.22                  | Shahu     | 21.14                  |
| Caizi     | 168.50                 | Hongze   | 1663.31                | Shaobo    | 123.19                 |
| Chaohu    | 787.97                 | Huangpi  | 33.19                  | Shengjin  | 95.89                  |
| Chengdong | 110.32                 | Huayuan  | 52.48                  | Shijiu    | 214.31                 |
| Chenghu   | 43.59                  | Jiaogang | 40.80                  | Taihu     | 2444.75                |
| Chengxi   | 30.54                  | Longgan  | 280.29                 | Taohu     | 89.09                  |
| Daguan    | 146.13                 | Nanyi    | 197.84                 | Tianjing  | 22.96                  |
| Dazong    | 30.02                  | Nvshan   | 107.32                 | Tuohu     | 44.33                  |
| Dianshan  | 59.18                  | Pogang   | 84.83                  | Wabu      | 162.13                 |
| Gaotang   | 57.07                  | Pohu     | 176.67                 | Wuchang   | 112.02                 |
| Gaoyou    | 639.17                 | Poyang   | 3192                   | Yangcheng | 118.05                 |

Table S2. Variables.

| ID | Variable | ID | Variable | ID | Variable  | ID | Variable     |
|----|----------|----|----------|----|-----------|----|--------------|
| 1  | AFAI     | 23 | 1/b3     | 45 | $e^{b8}$  | 67 | $(b13)^2$    |
| 2  | CMI      | 24 | 1/b4     | 46 | $e^{b9}$  | 68 | $(b14)^2$    |
| 3  | TWI      | 25 | 1/b5     | 47 | $e^{b10}$ | 69 | $(b15)^2$    |
| 4  | b1       | 26 | 1/b6     | 48 | $e^{b11}$ | 70 | $(b16)^2$    |
| 5  | b2       | 27 | 1/b7     | 49 | $e^{b12}$ | 71 | $(b17)^2$    |
| 6  | b3       | 28 | 1/b8     | 50 | $e^{b13}$ | 72 | $\sqrt{b1}$  |
| 7  | b4       | 29 | 1/b9     | 51 | $e^{b14}$ | 73 | $\sqrt{b2}$  |
| 8  | b5       | 30 | 1/b10    | 52 | $e^{b15}$ | 74 | $\sqrt{b3}$  |
| 9  | b6       | 31 | 1/b11    | 53 | $e^{b16}$ | 75 | $\sqrt{b4}$  |
| 10 | b7       | 32 | 1/b12    | 54 | $e^{b17}$ | 76 | $\sqrt{b5}$  |
| 11 | b8       | 33 | 1/b13    | 55 | $(b1)^2$  | 77 | $\sqrt{b6}$  |
| 12 | b9       | 34 | 1/b14    | 56 | $(b2)^2$  | 78 | $\sqrt{b7}$  |
| 13 | b10      | 35 | 1/b15    | 57 | $(b3)^2$  | 79 | $\sqrt{b8}$  |
| 14 | b11      | 36 | 1/b16    | 58 | $(b4)^2$  | 80 | $\sqrt{b9}$  |
| 15 | b12      | 37 | 1/b17    | 59 | $(b5)^2$  | 81 | $\sqrt{b10}$ |
| 16 | b13      | 38 | $e^{b1}$ | 60 | $(b6)^2$  | 82 | $\sqrt{b11}$ |
| 17 | b14      | 39 | $e^{b2}$ | 61 | $(b7)^2$  | 83 | $\sqrt{b12}$ |
| 18 | b15      | 40 | $e^{b3}$ | 62 | $(b8)^2$  | 84 | $\sqrt{b13}$ |
| 19 | b16      | 41 | $e^{b4}$ | 63 | $(b9)^2$  | 85 | $\sqrt{b14}$ |
| 20 | b17      | 42 | $e^{b5}$ | 64 | $(b10)^2$ | 86 | $\sqrt{b15}$ |
| 21 | 1/b1     | 43 | $e^{b6}$ | 65 | $(b11)^2$ | 87 | $\sqrt{b16}$ |
| 22 | 1/b2     | 44 | $e^{b7}$ | 66 | $(b12)^2$ | 88 | $\sqrt{b17}$ |

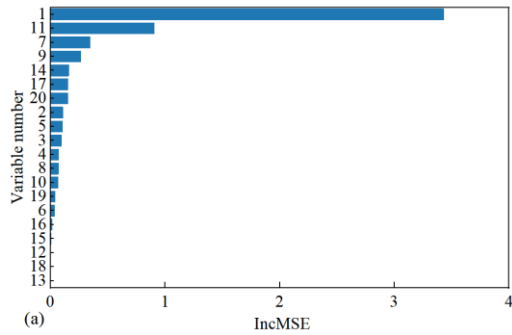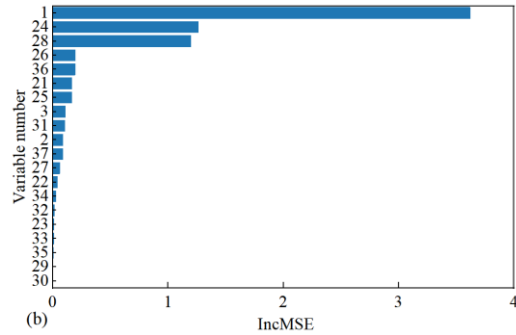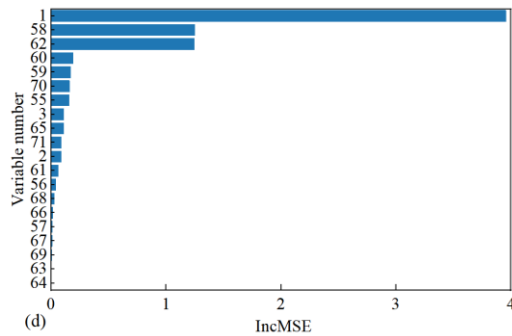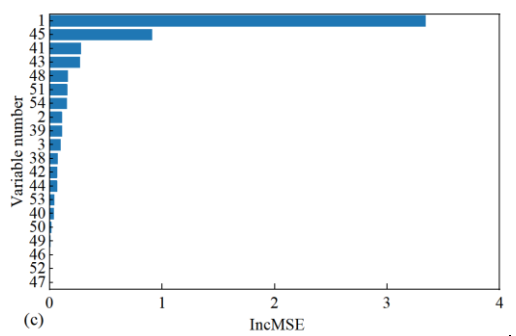

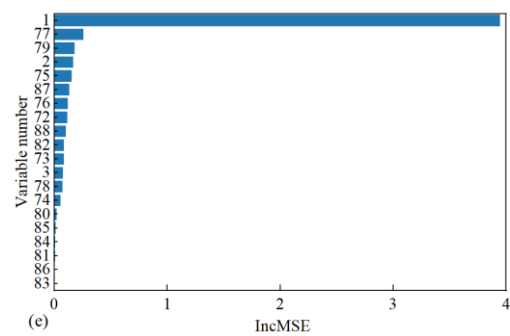

**Figure S1. Importance rank: (a) Original; (b) Inverse; (c) Exponential; (d) Square; (e) Square root.**

(Please refer to Supplementary Material Table S2 for detailed numbering)
